# Supplementary material for: An autophagy enhancer ameliorates diabetes of human IAPP-transgenic mice through clearance of amyloidogenic oligomer
Source: PubMed Central journal article supplement (PMC7794419; doi:10.1038/s41467-020-20454-z), 2021-01-08
Supplement: 41467_2020_20454_MOESM1_ESM.pdf [file 41467_2020_20454_MOESM1_ESM.pdf]

## Supplementary Information

### **An autophagy enhancer ameliorates diabetes of human *IAPP*-transgenic mice through clearance of amyloidogenic oligomer**

Jinyoung Kim, Kihyoun Park, Min Jung Kim, Hyejin Lim, Kook Hwan Kim, Sun-Woo Kim, Eun-Seo Lee, Hyongbum (Henry) Kim, Sung Joo Kim, Kyu Yeon Hur, Jae Hyeon Kim, Jin Hee Ahn, Kun-Ho Yoon, Ji-Won Kim & Myung-Shik Lee

Correspondence to: [mslee0923@yuhs.ac](mailto:mslee0923@yuhs.ac)

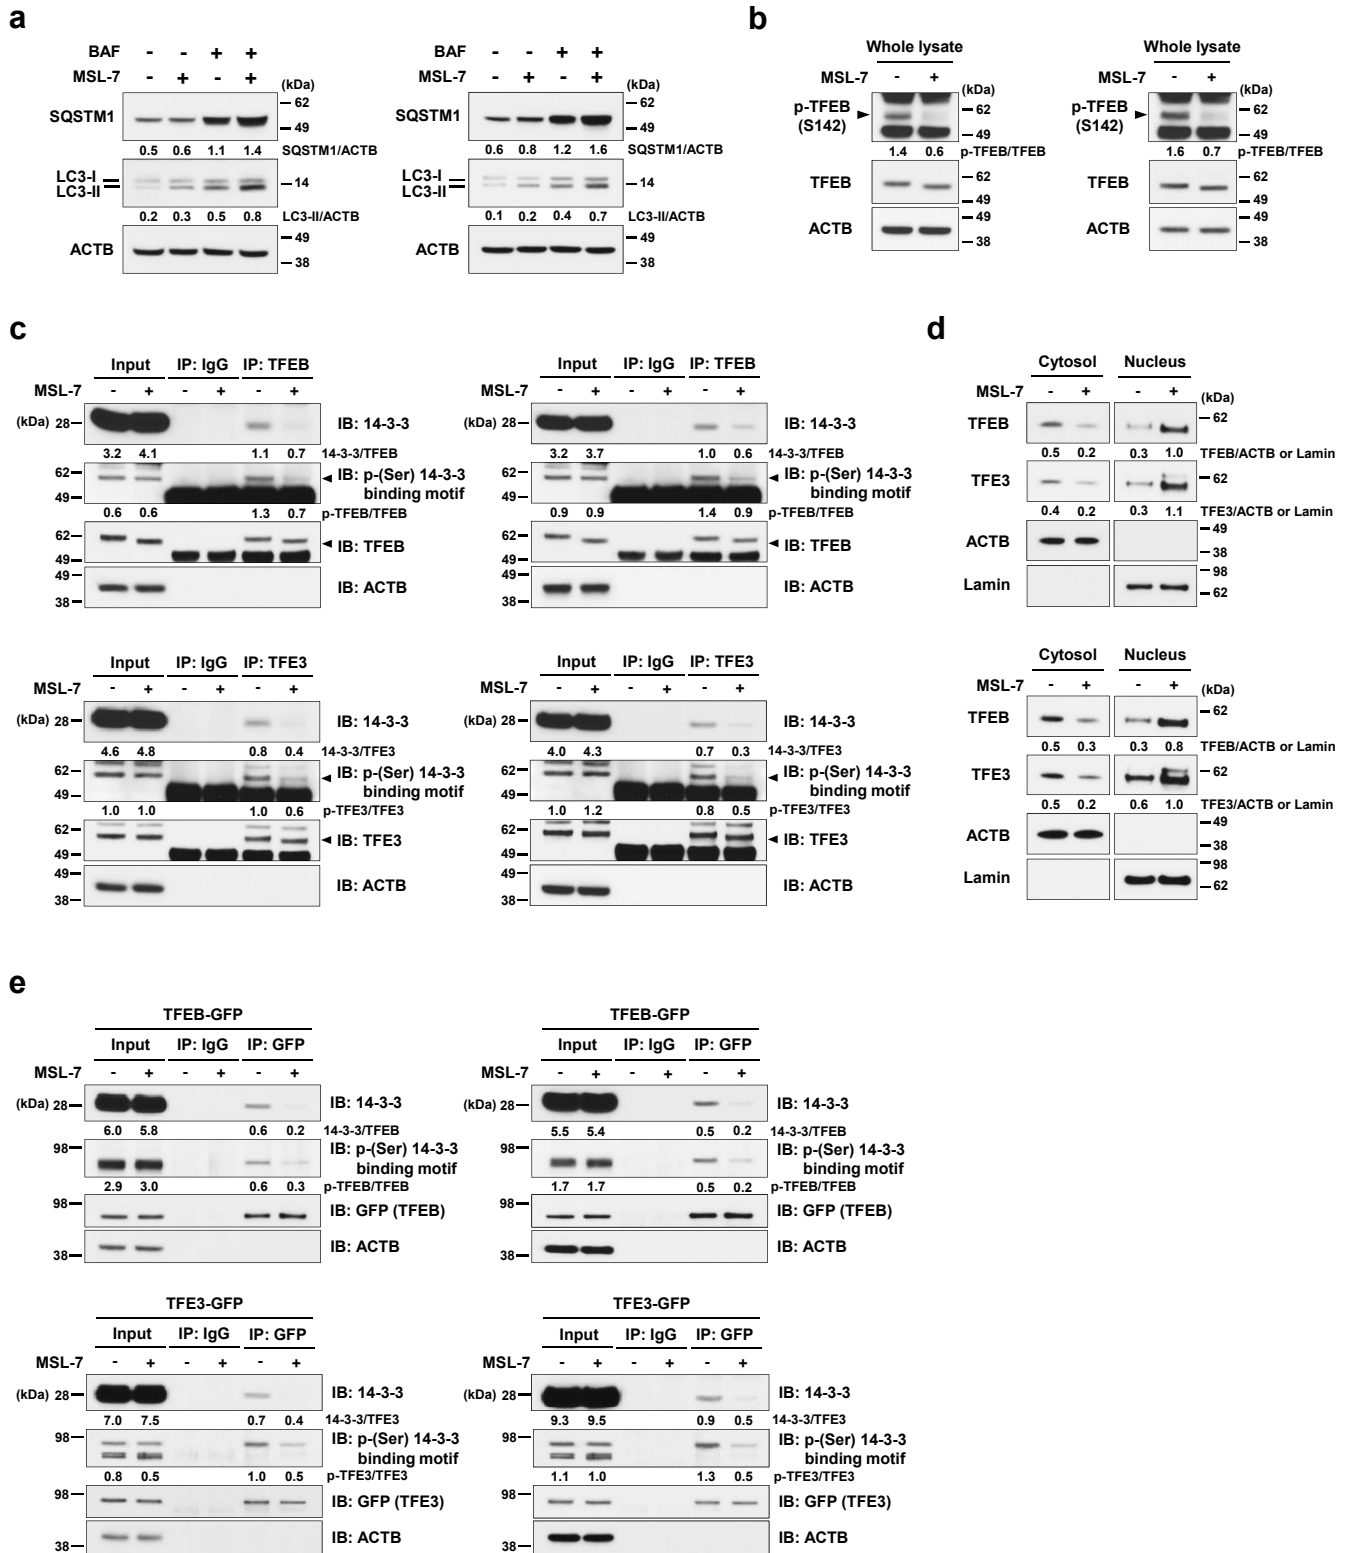

Supplementary Fig. 1 | See next page for caption

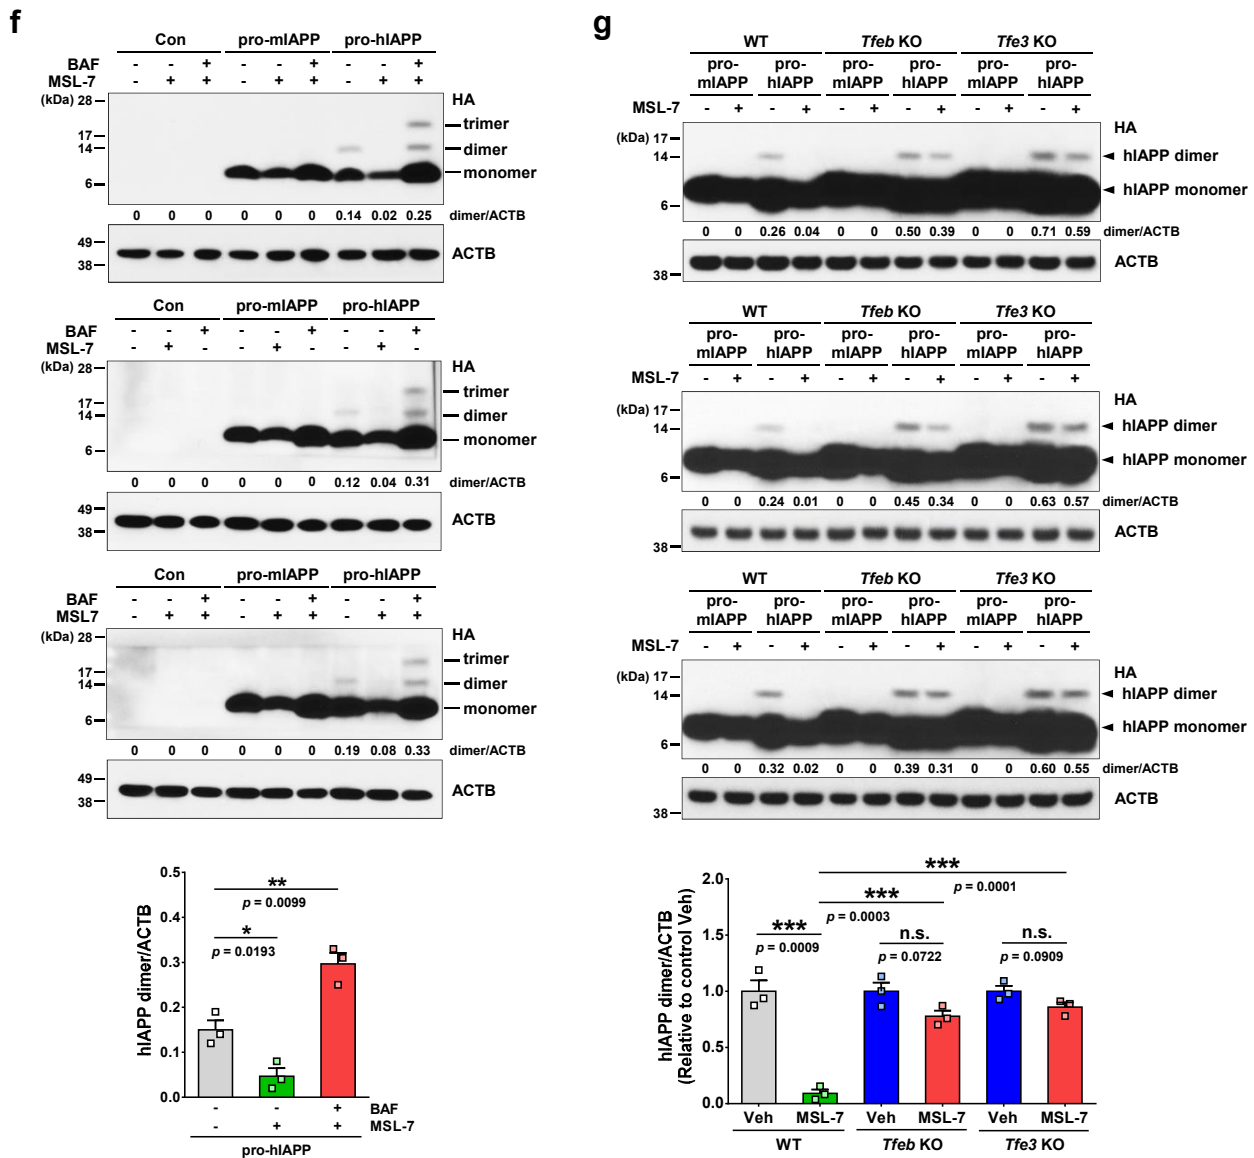

**Supplementary Fig. 1 | All immunoblots including representative blots in the Fig. 1, 2, and 4, and quantification of band intensities. a** All immunoblots of Fig. 1b. **b** All immunoblots of Fig. 1e. **c** All immunoblots of Fig. 1f. **d** All immunoblots of Fig. 1g. **e** All immunoblots of Fig. 1h. **f** All immunoblots of Fig. 2a with densitometric quantification ( $F = 35.8$ , df treatment = 2, df residual = 6). **g** All immunoblots of Fig. 4c with densitometric quantification ( $F = 32.9$ , df treatment = 5, df residual = 12). All data in this figure are the means  $\pm$  SEM from 2~3 independent experiments performed. \* $P$ , < 0.05; \*\* $P$ , < 0.01; \*\*\* $P$ , < 0.001 by one-way ANOVA with Tukey's post-hoc test (f,g). (n.s., not significant) Source data are provided as a Source Data file.

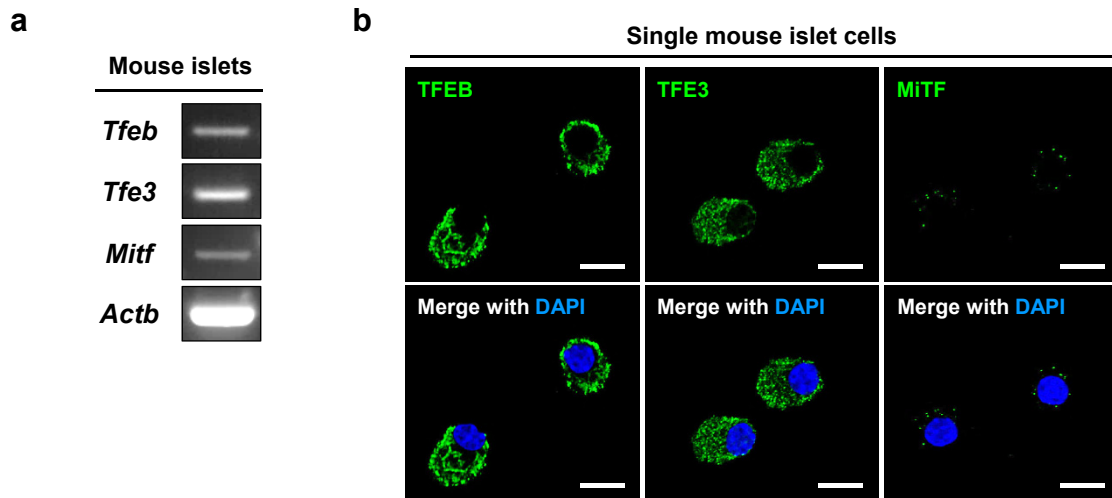

**Supplementary Fig. 2 | Expression of MiTF/TFE family member genes in primary murine islets. a** RT-PCR was conducted using mRNA prepared from primary murine islet cells and primers specific for the indicated genes. **b** Primary murine islet cells were subjected to immunostaining using anti-TFEB, -TFE3 or -MiTF antibody. (scale bar, 10  $\mu$ m) Figure in **b** is representative of 2 experiments performed independently.

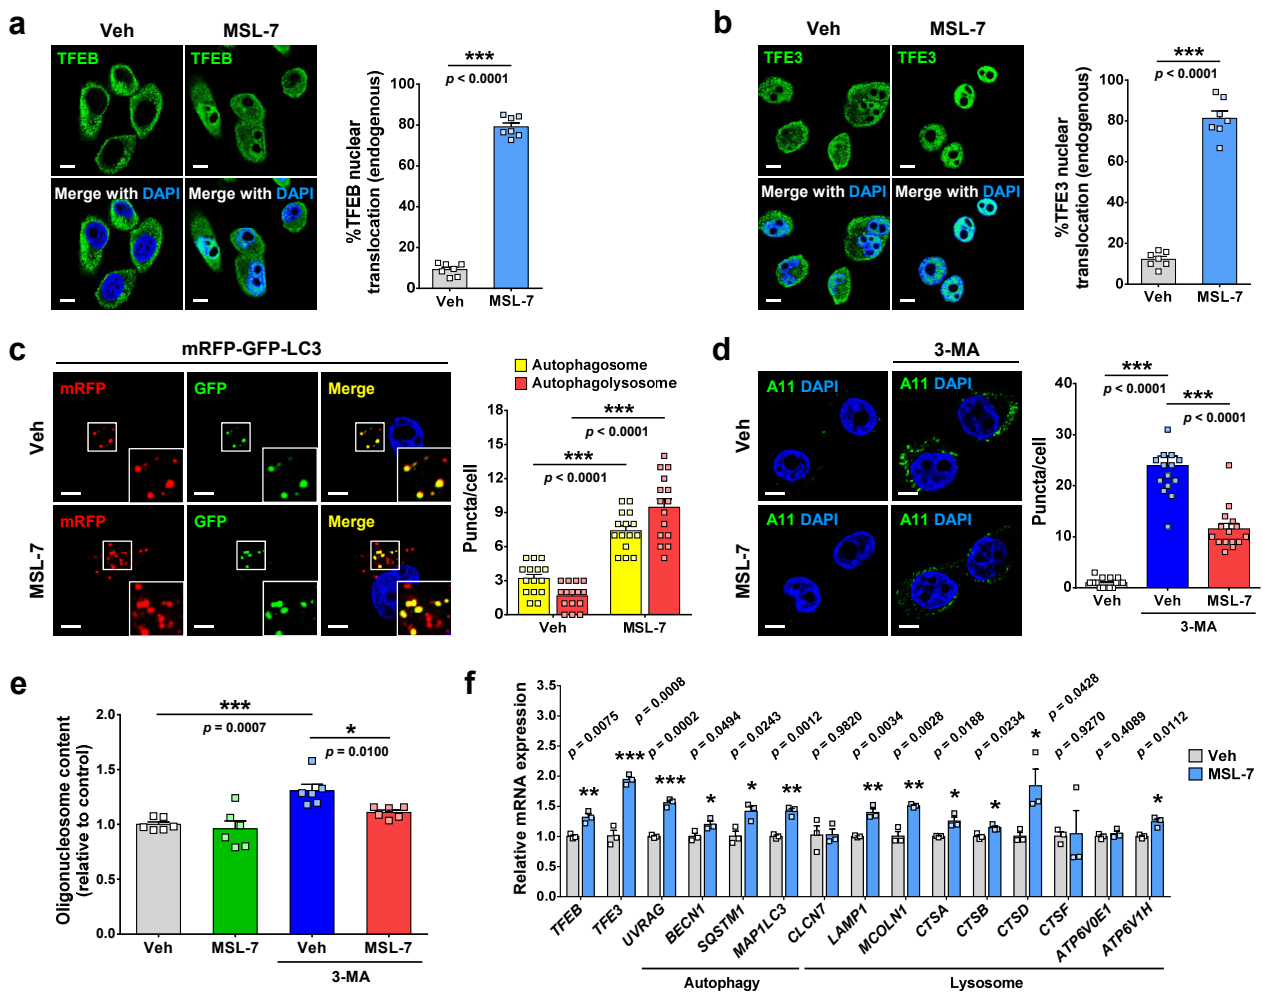

**Supplementary Fig 3 | hIAPP oligomer clearance by MSL-7 in a human islet cell line.** **a-b** 1.1B4 cells generated by electrofusion of primary human islet cells to human pancreatic cancer cells were treated with MSL-7 for 4 h, and nuclear translocation of TFEB or TFE3 was examined by confocal microscopy after immunostaining using anti-TFEB ( $t = 31.7$ ,  $df = 12$ ) (**a**) or -TFE3 antibodies ( $t = 18.0$ ,  $df = 12$ ) (**b**) **c** 1.1B4 cells transfected with *mRFP-GFP-LC3* tandem construct were treated with MSL-7 for 16 h, and the numbers of autophagosome and autophagolysosome were counted ( $t = 7.5$ ,  $df = 28$  for autophagosome;  $t = 9.8$ ,  $df = 28$  for autophagolysosome) (right). Representative pictures are presented (left). Inset images were magnified to show red (autophagolysosomes), green, and yellow (autophagosomes) puncta. **d** 1.1B4 cells treated with MSL-7 with or without 3-MA for 16 h were subjected to immunostaining using A11 antibody recognizing hIAPP oligomer. Confocal microscopy was conducted after nuclear staining with DAPI, and the number of A11<sup>+</sup> puncta was counted ( $F = 82.8$ ,  $df$  treatment = 2,  $df$  residual = 42) (right). Representative pictures are presented (left). **e** After treatment of 1.1B4 cells with MSL-7 in the presence or absence of 3-MA, apoptosis was determined ( $F = 10.2$ ,  $df$  treatment = 3,  $df$  residual = 20). **f** Real-time RT-PCR was performed using mRNA prepared from 1.1B4 cells that were treated with MSL-7 and primers specific for human autophagy genes or lysosomal genes. All data in this figure are the means  $\pm$  SEM from more than 3 independent experiments performed in duplicate. (scale bar, 5  $\mu$ m)  $*P$ ,  $< 0.05$ ;  $**P$ ,  $< 0.01$ ;  $***P$ ,  $< 0.001$  by one-way ANOVA with Tukey's post-hoc test (**d,e**) and two-tailed Student's *t*-test (**a,b,c,f**).

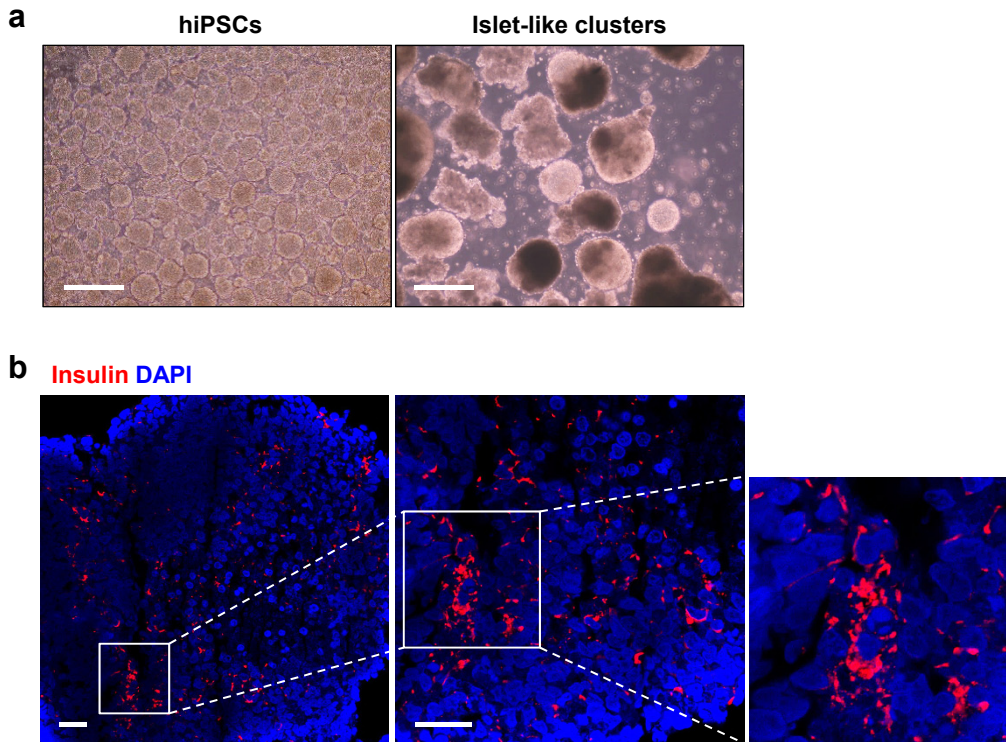

**Supplementary Fig. 4 | Generation of hiPSC-derived insulin-producing  $\beta$ -cells.** **a** Human induced pluripotent stem cells (hiPSCs) were differentiated into insulin-producing  $\beta$ -cells (hiPSC- $\beta$ -cells) using STEMdiff™ Pancreatic Progenitor Kit. Representative pictures of hiPSCs and islet-like clusters including hiPSC- $\beta$ -cells are shown. (scale bar, 250  $\mu$ m) **b** hiPSC- $\beta$ -cells were identified by immunofluorescence of islet-like clusters using anti-insulin antibody. Inset images were magnified. (scale bar, 25  $\mu$ m) All data in this figure are representative of 2 experiments performed independently.

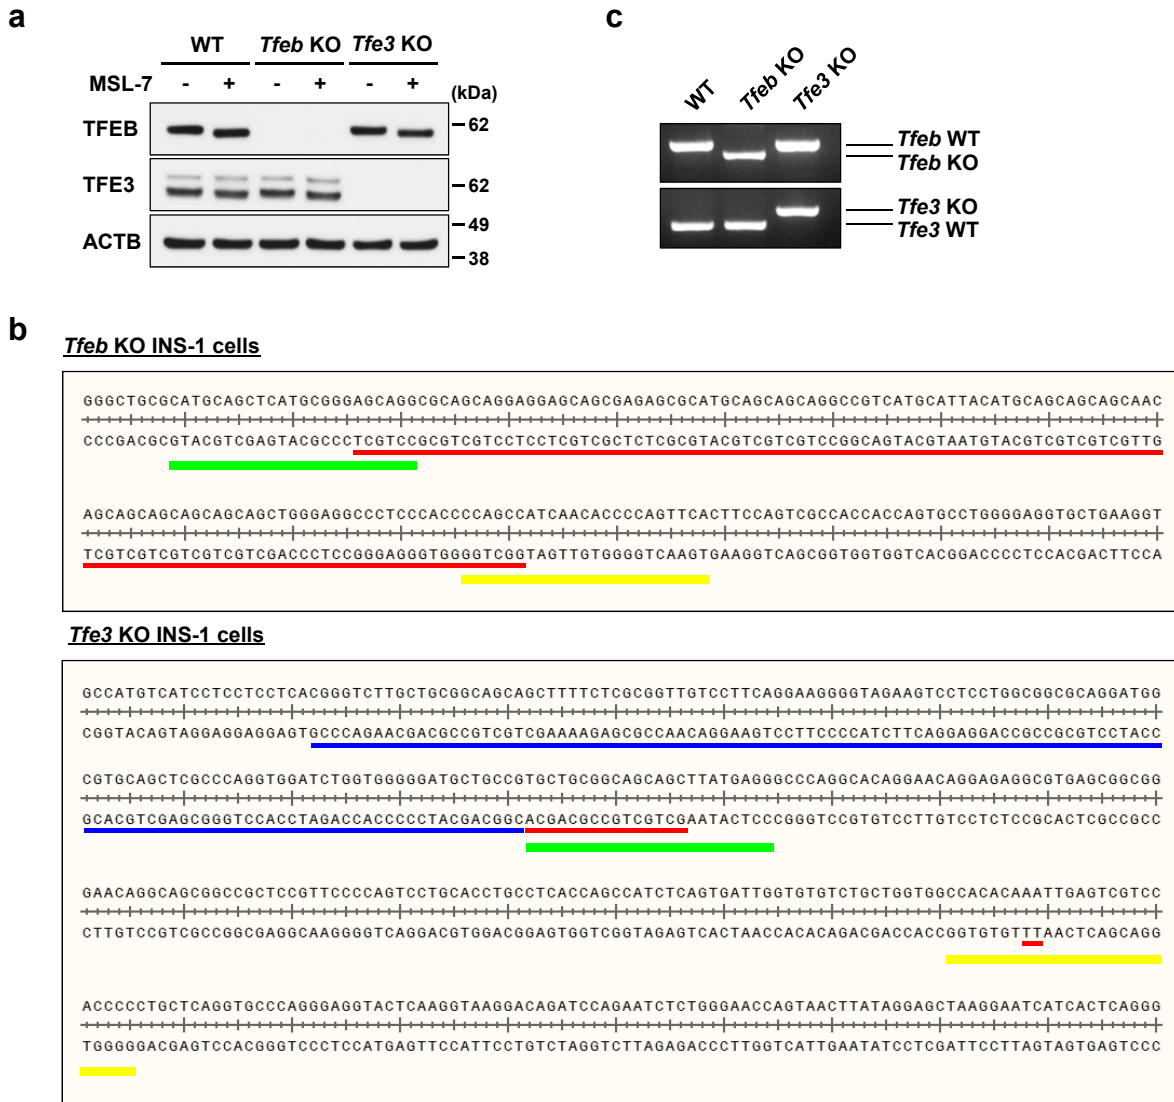

**Supplementary Fig. 5 | Generation of *Tfeb*- or *Tfe3*-KO cells.** **a** KO of *Tfeb* or *Tfe3* in INS-1 cells was conducted employing CRISPR/Cas9 technology as described in the Methods. KO of target genes was confirmed by immunoblot analysis using the indicated antibodies. **b** Nucleotide sequencing of target sequences in *Tfeb*- and *Tfe3*-KO cells. Target loci of sgRNA are shown (green underline, respective sgRNA1; yellow underline, respective sgRNA2). Sequences with red underline indicate deleted sequences in *Tfeb*- and *Tfe3*-KO cells. Sequences with blue underline indicate inserted donor sequences in *Tfe3*-KO cells. **c** PCR using cellular DNA and specific primers flanking the target loci. The data in **a** of this figure is representative of 2 experiments performed independently. Source data are provided as a Source Data file.

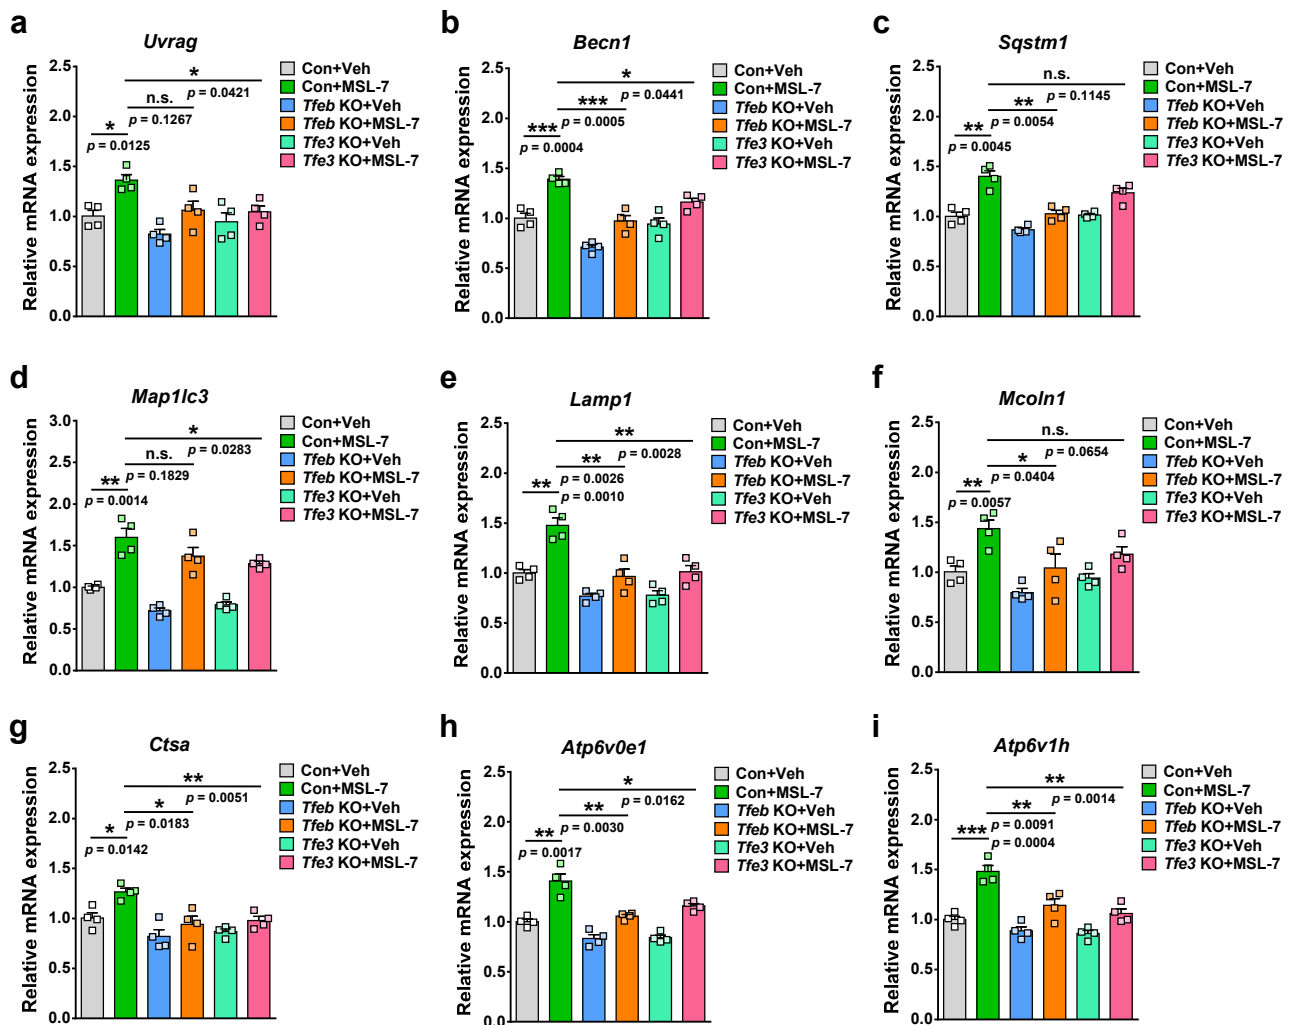

**Supplementary Fig. 6 | Reduced induction of autophagy genes and lysosomal genes by MSL-7 in**

**Tfeb- or Tfe3-KO INS-1 cells.** After treatment of *Tfeb*- or *Tfe3*-KO INS-1 cells with MSL-7 for 6 h, real-

time RT-PCR was conducted using primers specific for the indicated genes. ( $F = 6.9$ ,  $df$  treatment = 5,  $df$  residual = 18 in **a**;

$F = 27.6$ ,  $df$  treatment = 5,  $df$  residual = 18 in **b**;

$F = 26.2$ ,  $df$  treatment = 5,  $df$  residual = 18 in **c**;

$F = 28.3$ ,  $df$  treatment = 5,  $df$  residual = 18 in **d**;

$F = 21.6$ ,  $df$  treatment = 5,  $df$  residual = 18 in **e**;

$F = 7.5$ ,  $df$  treatment = 5,  $df$  residual = 18 in **f**;

$F = 8.2$ ,  $df$  treatment = 5,  $df$  residual = 18 in **g**;

$F = 32.4$ ,  $df$  treatment = 5,  $df$  residual = 18 in **h**;

$F = 22.5$ ,  $df$  treatment = 5,  $df$  residual = 18 in **i**) All data in this figure

are the means  $\pm$  SEM from more than 3 independent experiments performed in duplicate. \* $P$ , < 0.05; \*\* $P$ ,

< 0.01; \*\*\* $P$ , < 0.001 by one-way ANOVA with Tukey's post-hoc test (**a-i**). (n.s., not significant)



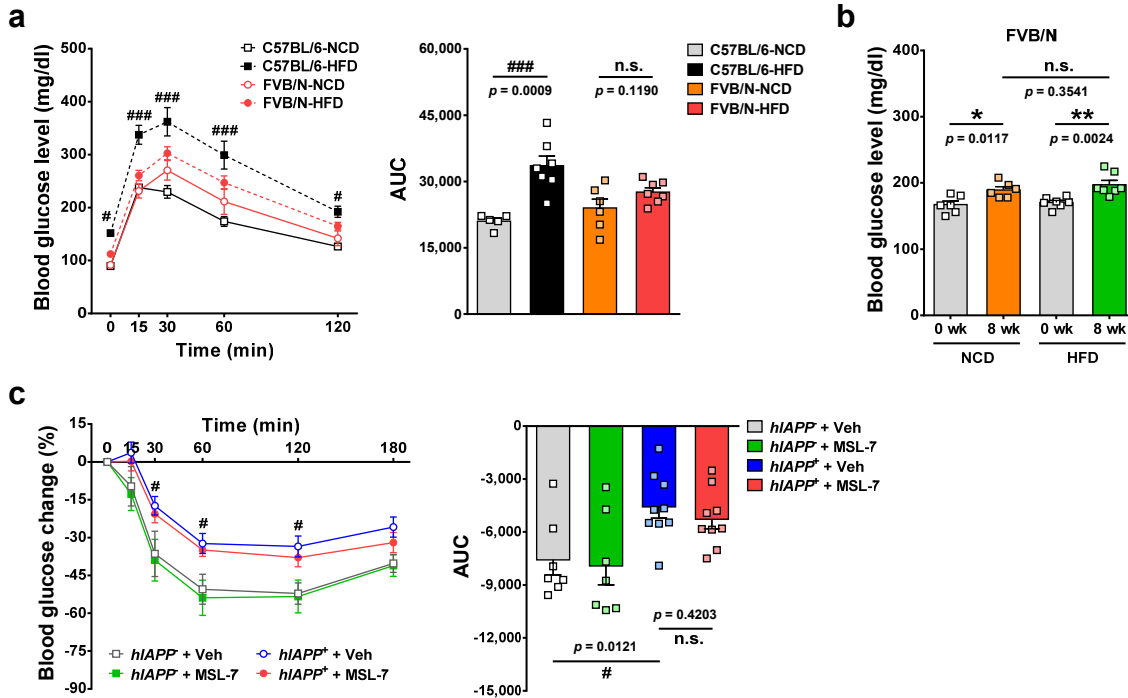

**Supplementary Fig. 7 | No effect of MSL-7 on insulin sensitivity of mice of FVB/N background on HFD. a** Glucose tolerance test (GTT) was conducted after HFD or NCD feeding of C57BL/6 or FVB/N mice for 8 weeks ( $F = 13.3$ ,  $df = 3$ ) (left). Area under the curve (AUC) was calculated ( $F = 10.0$ ,  $df$  treatment = 3,  $df$  residual = 21) (right). ( $n = 5\sim 7$ ) **b** Nonfasting blood glucose level of FVB/N mice after HFD or NCD feeding for 8 weeks was determined ( $F = 8.5$ ,  $df$  treatment = 3,  $df$  residual = 22). ( $n = 6\sim 7$ ) **c** MSL-7 (50 mg/kg) was administered intraperitoneally 3 times a week for 8 weeks to 16-week-old male  $hiAPP^+$  and  $hiAPP^-$  mice on HFD, and insulin tolerance test (ITT) was conducted ( $F = 4.3$ ,  $df = 3$ ) (left). AUC was calculated ( $F = 4.7$ ,  $df$  treatment = 3,  $df$  residual = 28) (right). ( $n = 7\sim 9$ ) All data in this figure are the means  $\pm$  SEM from more than 2 independent experiments. # $P$  or \* $P$ ,  $< 0.05$ ; \*\* $P$ ,  $< 0.01$ ; ### $P$ ,  $< 0.001$  by two-way ANOVA with Bonferroni's post-hoc test (**a,c**) and one-way ANOVA with Tukey's post-hoc test (**a-c**). (#, comparison between HFD-fed C57BL/6 and NCD-fed C57BL/6 mice; \*, comparison between HFD-fed FVB/N and NCD-fed FVB/N mice in **a**; #, comparison between Veh-treated  $hiAPP^+$  and Veh-treated  $hiAPP^-$  mice in **c**) (n.s., not significant)



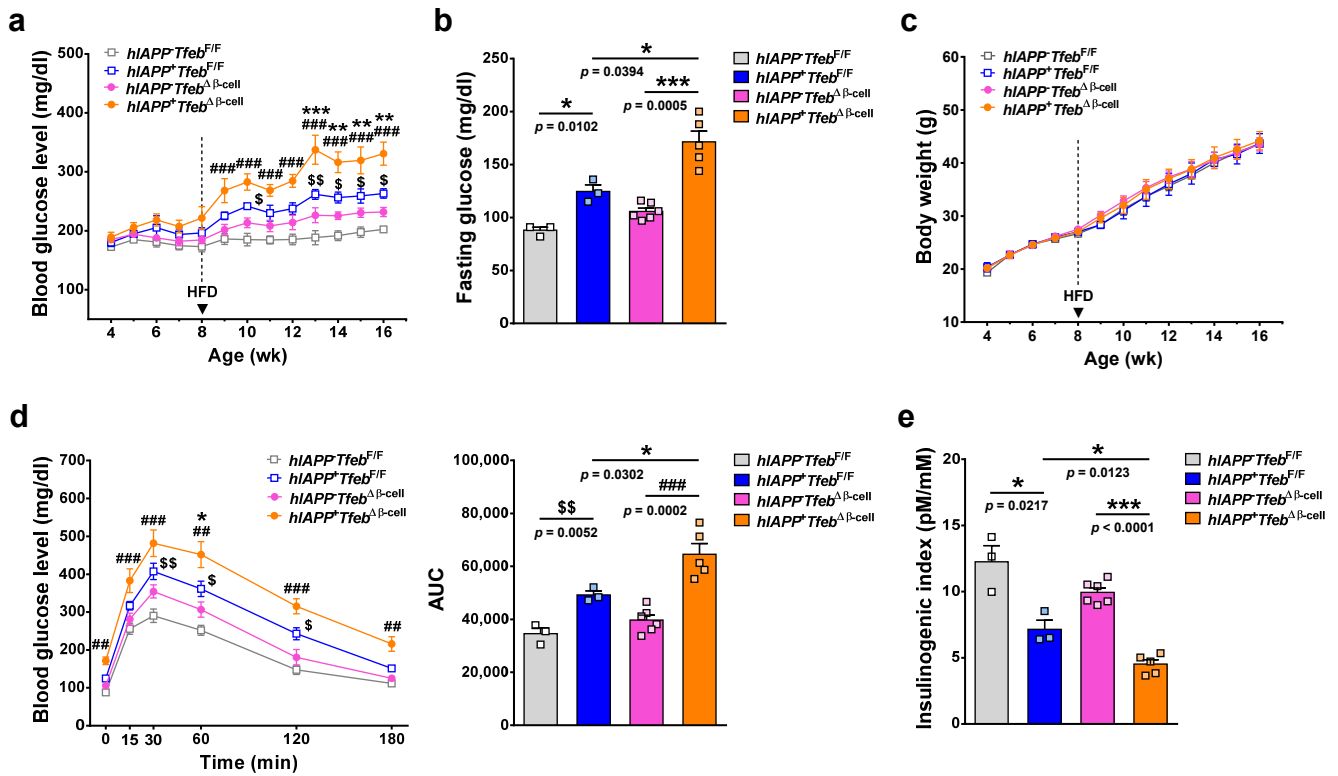

**Supplementary Fig. 9 | Effect of pancreatic  $\beta$ -cell-specific *Tfeb* KO on diabetes and  $\beta$ -cell function of *hiAPP*<sup>+</sup> mice on HFD.**

**a** *hiAPP*<sup>+</sup>*Tfeb* <sup>$\Delta\beta$ -cell</sup> and *hiAPP*<sup>+</sup>*Tfeb*<sup>F/F</sup> mice were generated and fed HFD for 8 weeks. Nonfasting blood glucose was monitored weekly ( $F = 22.6$ ,  $df = 3$ ). **b** Fasting blood glucose was determined in *hiAPP*<sup>+</sup>*Tfeb* <sup>$\Delta\beta$ -cell</sup> and *hiAPP*<sup>+</sup>*Tfeb*<sup>F/F</sup> mice fed HFD ( $F = 28.0$ ,  $df$  treatment = 3,  $df$  residual = 13). **c** Body weight was monitored before and during HFD feeding of *hiAPP*<sup>+</sup>*Tfeb* <sup>$\Delta\beta$ -cell</sup> and *hiAPP*<sup>+</sup>*Tfeb*<sup>F/F</sup> mice. **d** GTT was conducted in *hiAPP*<sup>+</sup>*Tfeb* <sup>$\Delta\beta$ -cell</sup> and *hiAPP*<sup>+</sup>*Tfeb*<sup>F/F</sup> mice fed HFD ( $F = 12.4$ ,  $df = 3$ ) (left). AUC was calculated ( $F = 21.6$ ,  $df$  treatment = 3,  $df$  residual = 13) (right). **e** Insulinogenic index was calculated in HFD-fed *hiAPP*<sup>+</sup>*Tfeb* <sup>$\Delta\beta$ -cell</sup> or *hiAPP*<sup>+</sup>*Tfeb*<sup>F/F</sup> mice according to the equation described in the Methods ( $F = 34.0$ ,  $df$  treatment = 3,  $df$  residual = 13). All data in this figure are the means  $\pm$  SEM from more than 2 independent experiments.  $\$P$  or  $*P$ ,  $< 0.05$ ;  $\$\$P$ ,  $**P$  or  $###P$ ,  $< 0.01$ ;  $***P$  or  $####P$ ,  $< 0.001$  by two-way ANOVA with Bonferroni's post-hoc test (**a,d**) and one-way ANOVA with Tukey's post-hoc test (**b,d,e**). ( $\$$ , comparison between *hiAPP*<sup>+</sup>*Tfeb*<sup>F/F</sup> and *hiAPP*<sup>+</sup>*Tfeb*<sup>F/F</sup> mice; \*, comparison between *hiAPP*<sup>+</sup>*Tfeb*<sup>F/F</sup> and *hiAPP*<sup>+</sup>*Tfeb* <sup>$\Delta\beta$ -cell</sup> mice; #, comparison between *hiAPP*<sup>+</sup>*Tfeb* <sup>$\Delta\beta$ -cell</sup> and *hiAPP*<sup>+</sup>*Tfeb* <sup>$\Delta\beta$ -cell</sup> mice in **a,d**) (**a-e**,  $n = 3-6$ )

**Supplementary Table 1.** Primer sequences of TFEB target genes (rat) for real-time RT-PCR.

| Name            | Forward (5'→3')        | Reverse (5'→3')         |
|-----------------|------------------------|-------------------------|
| <i>Tfeb</i>     | GGTCTTGGGCAAATCCCTTC   | ATCCTCGGAGTCTTTAAGCG    |
| <i>Tfe3</i>     | CATGCAACTGAGACAGCTCG   | GCTGTCAGGATCAAGGATGT    |
| <i>Uvrug</i>    | GCTCCATTTGAACACAAGGC   | ATTGCACACTGGGCTCTATG    |
| <i>Becn1</i>    | CCCAGCCAGGATGATGTCTAC  | GTATCTGTGCATTCCCTCACACA |
| <i>Sqstm1</i>   | TGGGAACTCGCTATAAGTGC   | GGGAAAGATGAGCTTGCTGT    |
| <i>Map1lc3</i>  | GTTAACATGAGCGAGTTGGT   | GTTTCTTGGGAGGCATAGACC   |
| <i>Clcn7</i>    | GGCAACCTGACGAGGAGA     | GAGCTTCTCGTTGTGTGGAA    |
| <i>Lamp1</i>    | CTCGCAATCACCTTTGGAGA   | GCCTTGATGTCAGTTGTGGA    |
| <i>Mcoln1</i>   | GGCGCGGCTCAGAGA        | CATCAACTTGCAGGGCTTG     |
| <i>Ctsa</i>     | TATCTTCACTCGCTTGCCAC   | GAGCCTTCCGAACATATGGG    |
| <i>Ctsb</i>     | CCAATGGCCGAGTCAATGTG   | GGAGGGATGGTGTAGGGTAAG   |
| <i>Ctsd</i>     | GGAAAGACGATCTGCCTGAG   | GCAAAGCCGACCCTATTGTA    |
| <i>Ctsf</i>     | ATGTTGGACAAGGATCCCCT   | GGTGATCCCATACTGAGCTG    |
| <i>Atp6v0e1</i> | CTTTGATCGTGATGAGCGTG   | TCCAAACAGAGGATTGAGCTG   |
| <i>Atp6v1h</i>  | CCAGGACCTTAGAATCTTGACA | AGAAGAGCATTGTAGCGGAC    |
| <i>Rpl32</i>    | GCTGCTGATGTGCAACAAAT   | TTCATTCTCTTCGCTGCGT     |

**Supplementary Table 2.** Primer sequences of TFEB target genes (human) for real-time RT-PCR.

| Name            | Forward (5'→3')        | Reverse (5'→3')        |
|-----------------|------------------------|------------------------|
| <i>TFEB</i>     | CGCATCAAGGAGTTGGGAAT   | GAGCTGCTTGTTGGTCATCT   |
| <i>TFE3</i>     | AATATCACTGCAGGCCACAC   | CAGCAAGACCCTCGATGAAG   |
| <i>UVRAG</i>    | GACTAATGGTCAGGTGTGACAG | GTCCTTTGTCTGGTGAAGGGAT |
| <i>BECN1</i>    | AGCTGCCGTTATACTGTTCTG  | AAACGTGTCTCGCCTTTCTC   |
| <i>SQSTM1</i>   | GATTCGCCGCTTCAGCTT     | CGTCCTCATCGCGGTAGT     |
| <i>MAP1LC3</i>  | GACCGCTGTAAGGAGGTACA   | GACCAACTCGCTCATGTTGA   |
| <i>CLCN7</i>    | CAACGTCTCTAAGAAGGTGTCC | GACTCGGAAAAGCGCAGAAC   |
| <i>LAMP1</i>    | TGCAAGTTCTAGCCGGTTTT   | TGTAGGAATTGCCGACTGTG   |
| <i>MCOLN1</i>   | CCGATGGTGGTACTGACTG    | CAGCTTGTGGAATTTGAGCG   |
| <i>CTSA</i>     | CCTGGAGTACAACCCCTATTC  | AGGCGGAAGAAATCTTGAAGG  |
| <i>CTSB</i>     | GAGAATGGCACACCCTACTG   | GCCACCACTTCTGATTCGAT   |
| <i>CTSD</i>     | ACAAGTTCACGTCCATCCG    | GGCGTCCATGTAGTTCTTG    |
| <i>CTSF</i>     | CTTCGCGCTGGAGATGTTT    | GAGTACAGCGACCCCTGA     |
| <i>ATP6V0E1</i> | TTGTGATGAGCGTGTTCTGG   | AGCCAAAAGAGATAGCAGCA   |
| <i>ATP6V1H</i>  | GTCTCTTCAAGTGATAGTTCGC | GATACTGGAGCTGAAAGCCAC  |
| <i>RPL32</i>    | TGCCCAACATTGGTTATGGAA  | AACATTGTGAGCGATCTCGG   |
